# Supplementary material for: Two-year quality of life after robot-assisted radical prostatectomy according to pentafecta criteria and cancer of the prostate risk assessment (CAPRA-S)
Source: PubMed Central journal article supplement (PMC8742105; doi:10.1038/s41598-021-04289-2), 2022-01-07
Supplement: 41598_2021_4289_MOESM1_ESM.pdf [file 41598_2021_4289_MOESM1_ESM.pdf]

**Supplemental Table 1:** Multi- and univariable logistic regression model for prediction of at least stable or improved Global Quality of Life (QL) and EORTC QLQ-C30 Summary Score at 24 months after robot-assisted radical prostatectomy

| Value                                                  | Multiivariable model |             |         | EORTC QLQ-C30 Summary Score no deterioration |             |         |
|--------------------------------------------------------|----------------------|-------------|---------|----------------------------------------------|-------------|---------|
|                                                        | OR                   | 95% CI      | p-value | OR                                           | 95% CI      | p-value |
| Preoperative Global Quality of Life (QL)               | 0.97                 | 0.96 - 0.97 | <0.001  | 1.00                                         | 0.99 - 1.01 | 0.4     |
| Fulfilled trifecta criteria at 24 months after surgery | 1.90                 | 1.60 - 2.26 | <0.001  | 2.13                                         | 1.79 - 2.53 | <0.001  |
| CAPRA-S risk group (high risk vs. low risk [REF])      | 0.58                 | 0.45 - 0.73 | <0.001  | 0.74                                         | 0.59 - 0.94 | 0.02    |
| Surgery complications (CDC ≥3b vs. 0-3a[REF])          | 0.31                 | 0.17 - 0.56 | <0.001  | 0.61                                         | 0.34 - 1.10 | 0.1     |
|                                                        | Univariable model    |             |         |                                              |             |         |
| Preoperative Global Quality of Life (QL)               | 0.97                 | 0.96 - 0.97 | <0.001  | 1.00                                         | 1.00 - 1.01 | 0.3     |
| Fulfilled trifecta criteria at 24 months after surgery | 1.95                 | 1.66 - 2.30 | <0.001  | 2.24                                         | 1.89 - 2.65 | <0.001  |
| CAPRA-S risk group (high risk vs. low risk [REF])      | 0.51                 | 0.41 - 0.64 | <0.001  | 0.61                                         | 0.49 - 0.77 | <0.001  |
| Surgery complications (CDC ≥3b vs. 0-3a[REF])          | 0.39                 | 0.24 - 0.63 | <0.001  | 0.74                                         | 0.44 - 1.22 | 0.2     |

CAPRA-S - the postsurgical Cancer of the Prostate Risk Assessment score, CDC - Clavien-Dindo classification, CI - confidence interval, OR - odds ratio
